# Supplementary material
Source: Springer Nature journal article supplement (https://www.springermedizin.de/resource/supplementary/12947_2009_310_MOESM2_ESM.pdf/9556792)

## Statin Users (Entire Field)

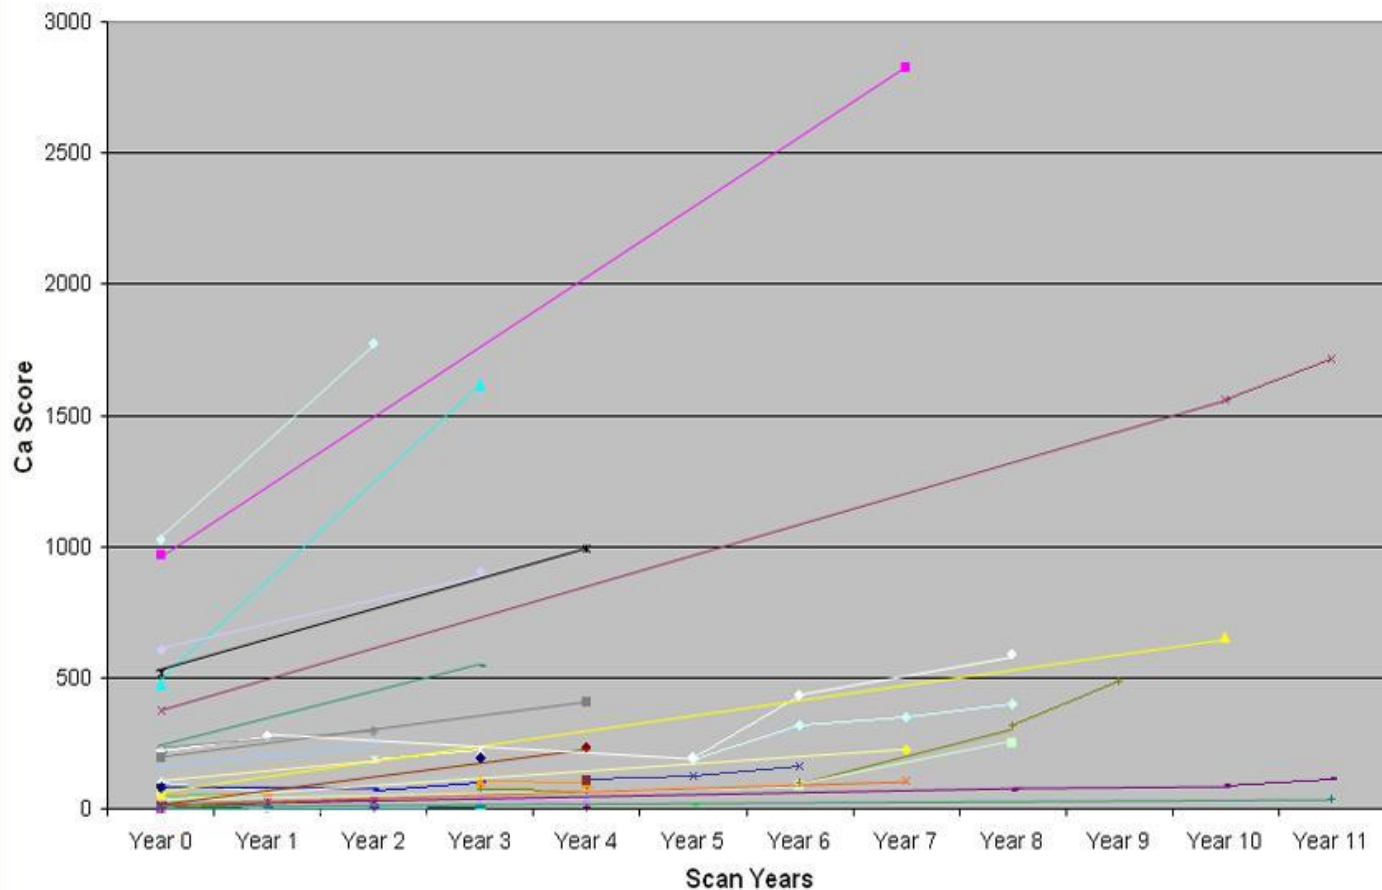

Supplement: MOESM2 [file 9556792]
